# Supplementary material
Source: PubMed Central journal article supplement (PMC5699982)
Supplement: 10815_2017_1001_MOESM1_ESM.pdf [file 10815_2017_1001_MOESM1_ESM.pdf]

# Tornado Analysis (ICER)

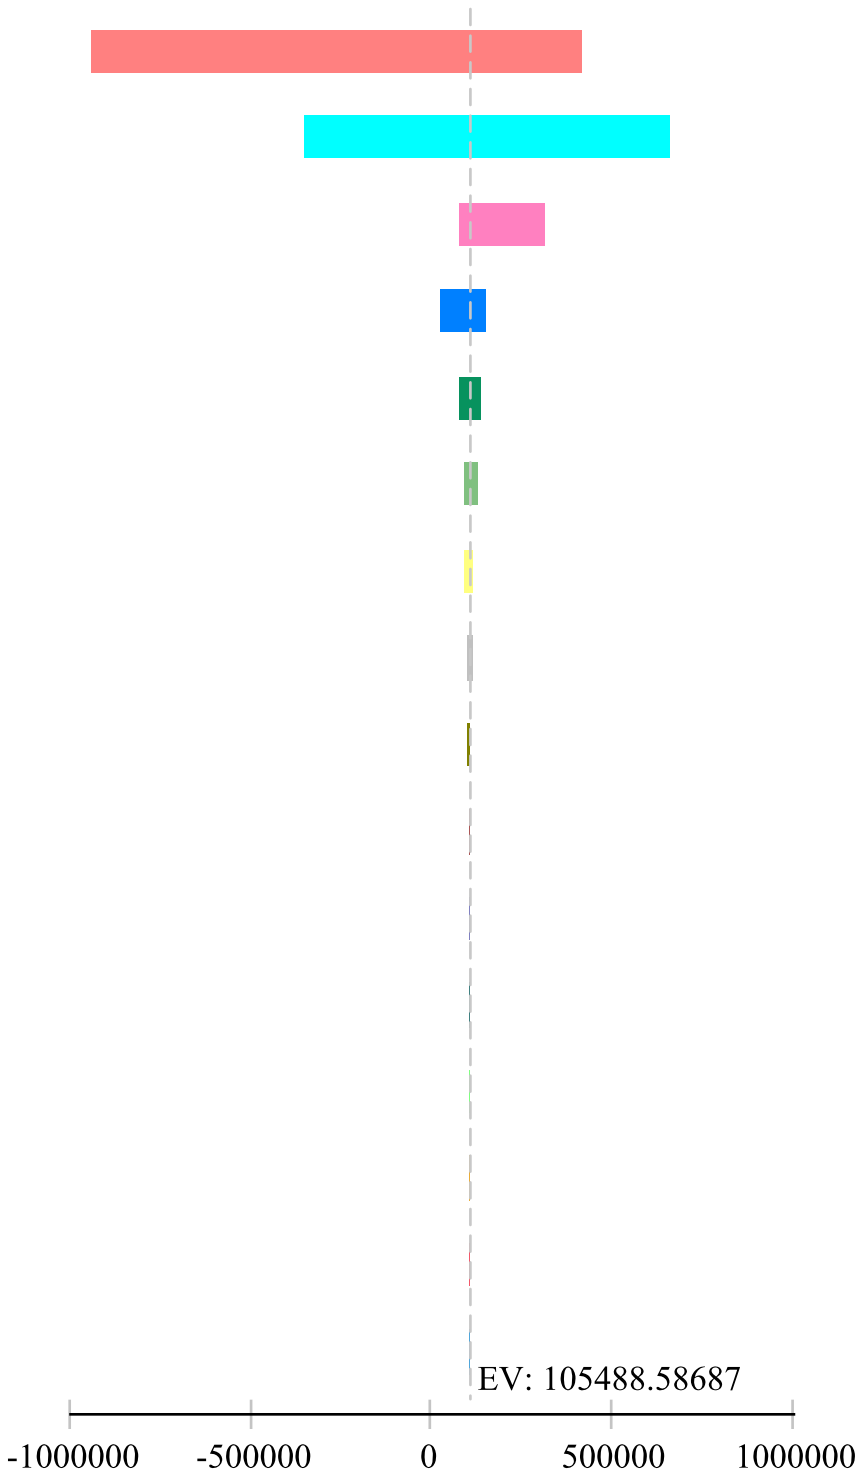

- Probability that at least one blastocyst meets traditional morphological criteria for transfer in a non-PGS cycle
- Probability that a cycle has at least one euploid blastocyst
- Cost of PGS
- Adjusted odds ratio of clinical pregnancy (PGS versus non-PGS)
- Adjusted odds ratio of miscarriage (PGS versus non-PGS)
- Probability of pregnancy in a non-PGS cycle that involves blastocyst transfer
- Probability of miscarriage in a pregnancy that results from a non-PGS cycle
- Probability that a blastocyst selected for transfer by traditional morphological criteria is aneuploid
- Probability of live birth from a viable pregnancy after blastocyst transfer in a non-PGS cycle
- Probability of live birth from a viable pregnancy in a cycle that involves the transfer of only euploid blastocyst(s)
- Cost of amniocentesis
- Cost of embryo transfer
- Probability that only one blastocyst is transferred in a transferred cycle
- Cost of miscarriage management
- Cost of second trimester pregnancy termination
- Cost of genetic counseling
