# Supplementary material
Source: PubMed Central journal article supplement (PMC5699982)

ICER

\$500,000  
\$450,000  
\$400,000  
\$350,000  
\$300,000  
\$250,000  
\$200,000  
\$150,000  
\$100,000  
\$50,000  
\$0

\$3,410  
\$4,414  
\$5,418  
\$6,422  
\$7,426  
\$8,430  
\$9,433  
\$10,437  
\$11,441  
\$12,445  
\$13,449

Cost of PGS

Odds ratio of pregnancy  
(IVF-PGS vs. IVF alone)

3.579  
2.736  
1.893  
1.050

- \$0-\$50,000
- \$50,000-\$100,000
- \$100,000-\$150,000
- \$150,000-\$200,000
- \$200,000-\$250,000
- \$250,000-\$300,000
- \$300,000-\$350,000
- \$350,000-\$400,000
- \$400,000-\$450,000
- \$450,000-\$500,000

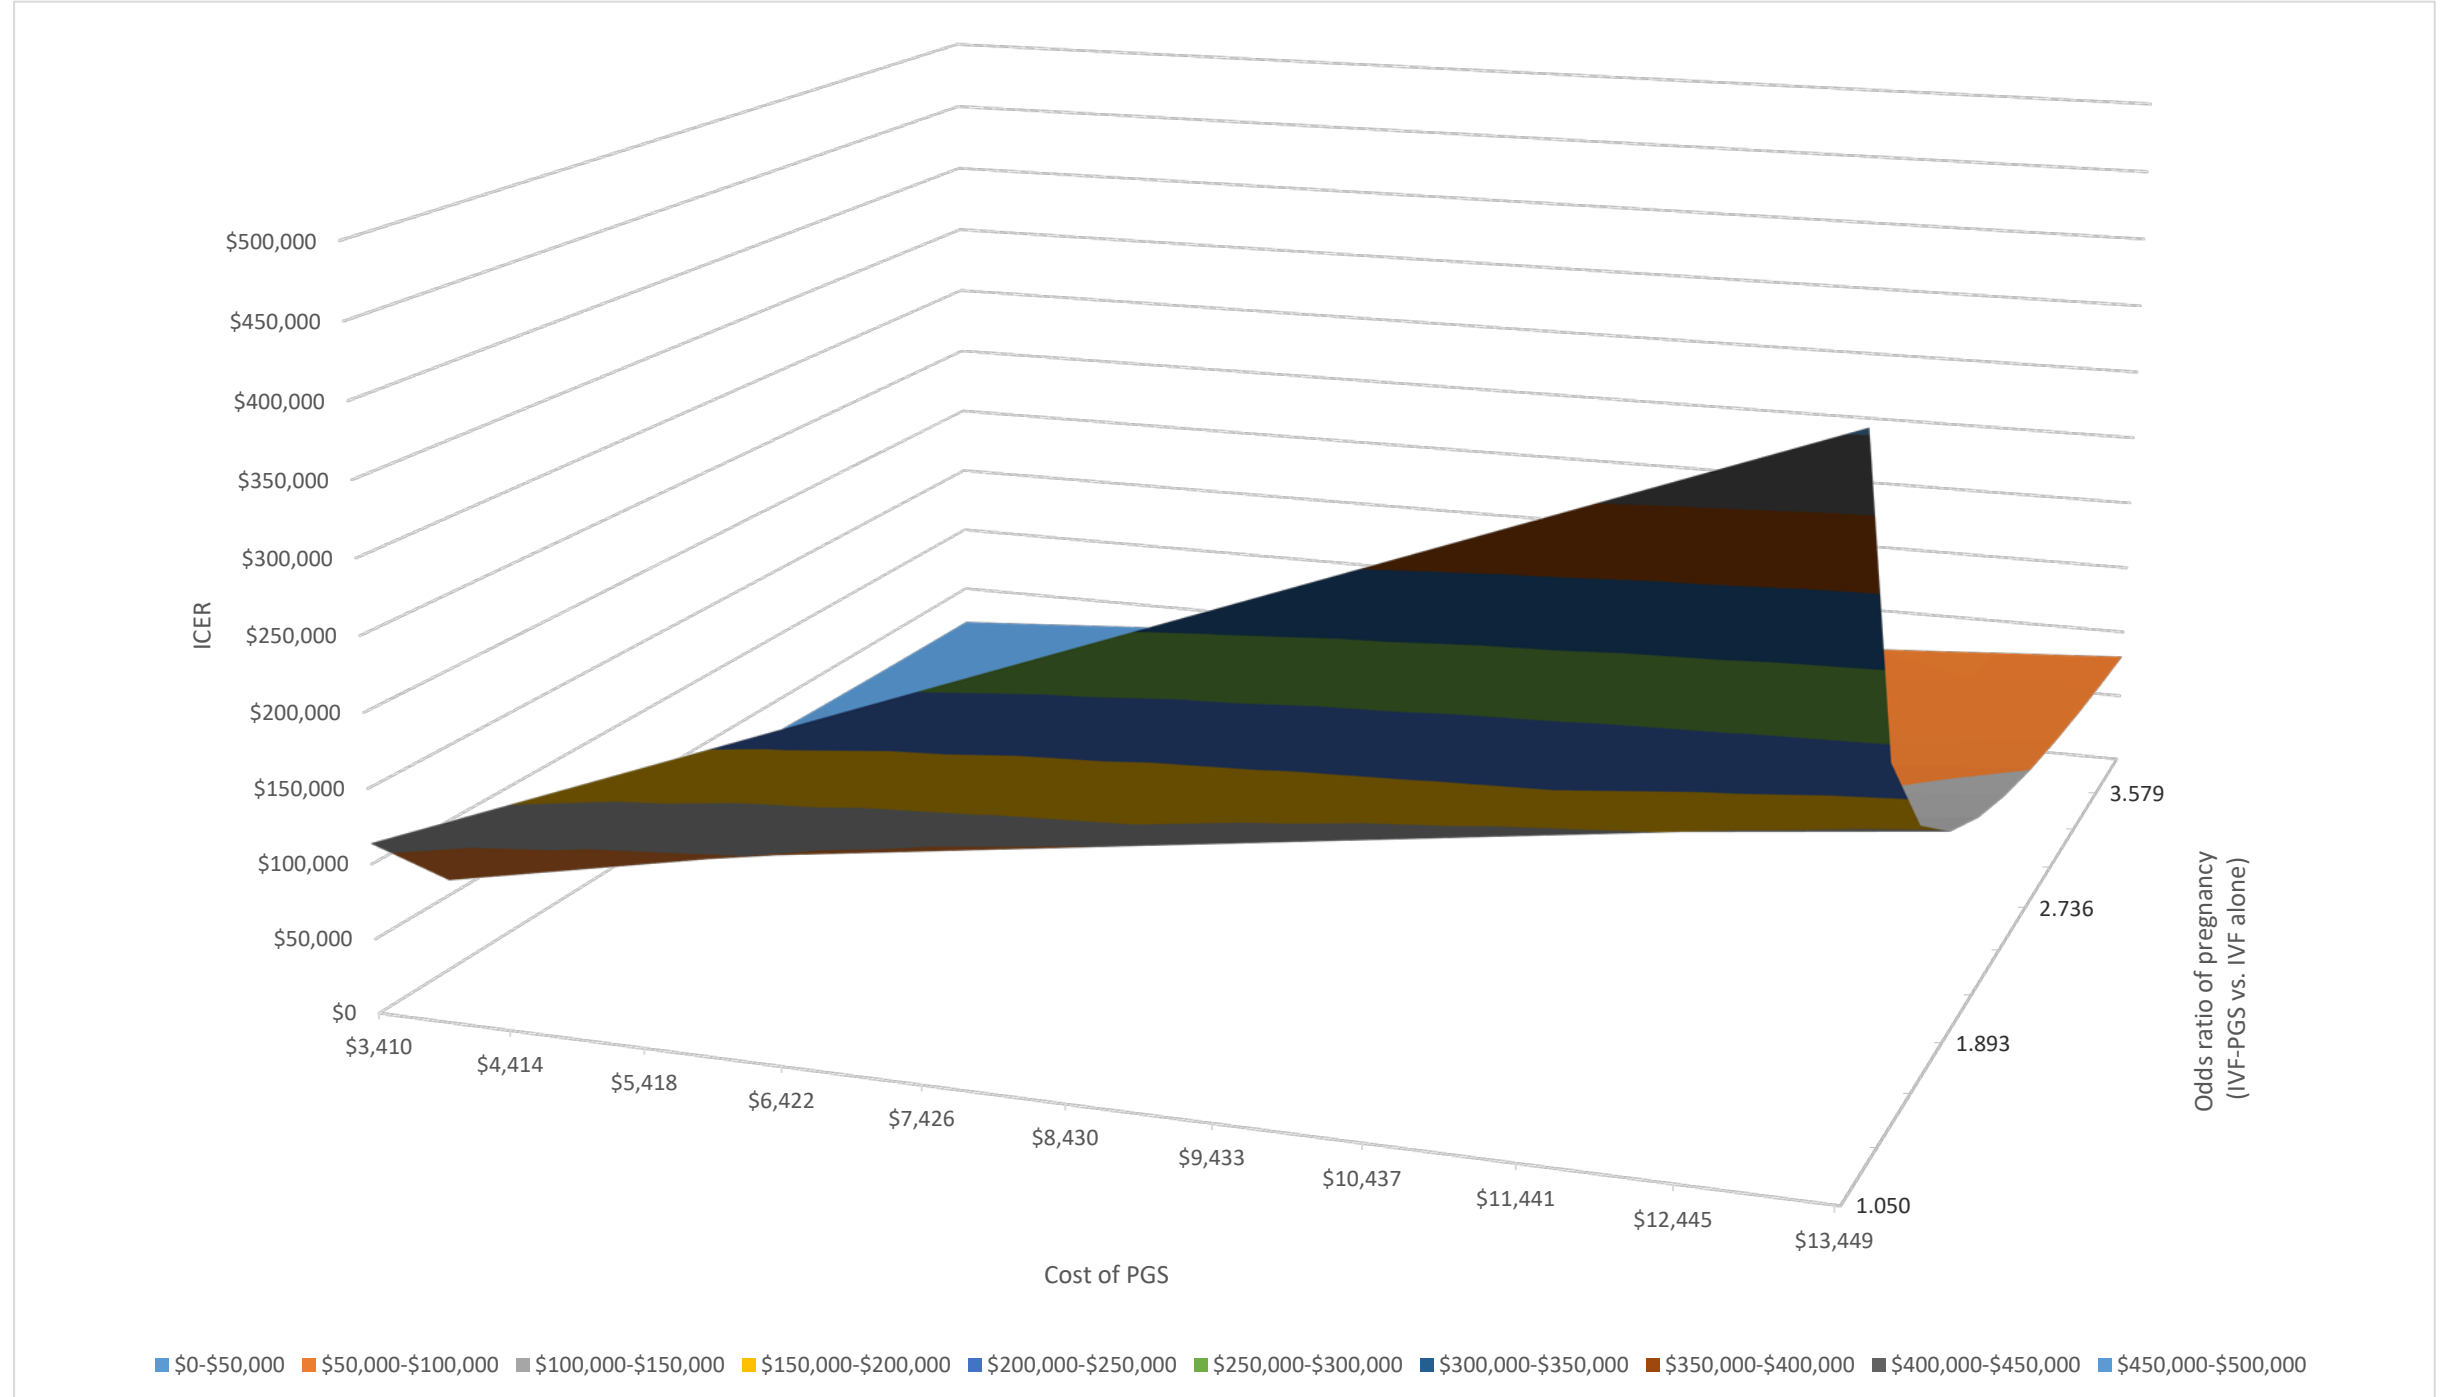

Supplement: 10815_2017_1001_MOESM2_ESM.pdf [file 10815_2017_1001_MOESM2_ESM.pdf]
